# Supplementary material for: Oxidation of pollutants via an electro-Fenton-like process in aqueous media using iron–zeolite modified electrodes
Source: Royal Society of Chemistry journal article supplement (doi:10.1039/d1nj01077h), 2021-01-01
Supplement: d1nj01077h1.pdf [file d1nj01077h1.pdf]

## Electronic Supplementary Information (ESI)

### Oxidation of pollutants by electro Fenton-like process in aqueous media using iron-zeolite modified electrodes

Marta Ferreira,<sup>a</sup> Nihat E. Sahin,<sup>b</sup> António M. Fonseca,<sup>a,c</sup> Pier Parpot,<sup>a,c\*</sup> and Isabel C. Neves,<sup>a,c\*</sup>

<sup>a</sup>CQUM, Centre of Chemistry, Chemistry Department, University of Minho, Campus de Gualtar, 4710-057 Braga, Portugal

<sup>b</sup>Laboratório de Catálise e Materiais (LCM), Laboratório Associado LSRE/LCM, Universidade do Porto, Rua Dr. Roberto Frias, 4200-465 Porto, Portugal

<sup>c</sup>CEB - Centre of Biological Engineering, University of Minho, Campus de Gualtar, 4710-057 Braga, Portugal

**Table S1.** Physicochemical characterization data acquired through N<sub>2</sub> adsorption-desorption and X-ray diffraction (XRD). Textural properties (specific surface area, pore volume, BJH pore diameter) of the samples.

|                           |                                                                    | ZSM-5 | Fe(II)ZSM-5 | Fe(II) <sub>T</sub> ZSM-5 | Fe(III)ZSM-5 | Fe(III) <sub>T</sub> ZSM-5 |
|---------------------------|--------------------------------------------------------------------|-------|-------------|---------------------------|--------------|----------------------------|
| N <sub>2</sub> adsorption | S <sub>BET</sub> (m <sup>2</sup> g <sup>-1</sup> ) <sup>a</sup>    | 411   | 335         | 374                       | 413          | 421                        |
|                           | S <sub>ext.</sub> (m <sup>2</sup> g <sup>-1</sup> ) <sup>c</sup>   | 169   | 113         | 135                       | 133          | 152                        |
|                           | V <sub>total</sub> (cm <sup>3</sup> g <sup>-1</sup> ) <sup>d</sup> | 0.26  | 0.22        | 0.22                      | 0.27         | 0.27                       |
|                           | V <sub>meso</sub> (cm <sup>3</sup> g <sup>-1</sup> ) <sup>e</sup>  | 0.16  | 0.12        | 0.12                      | 0.15         | 0.15                       |
|                           | V <sub>micro</sub> (cm <sup>3</sup> g <sup>-1</sup> ) <sup>f</sup> | 0.10  | 0.10        | 0.10                      | 0.12         | 0.12                       |
|                           | V <sub>micro</sub> /V <sub>total</sub> (%) <sup>g</sup>            | 38.5  | 45.4        | 45.4                      | 44.4         | 44.4                       |
|                           | S <sub>meso</sub> /S <sub>BET</sub> (%) <sup>h</sup>               | 41.1  | 33.7        | 36.1                      | 32.2         | 36.1                       |
|                           | V <sub>meso</sub> /V <sub>micro</sub> <sup>i</sup>                 | 1.60  | 1.20        | 1.20                      | 1.25         | 1.25                       |
|                           | ∅ <sub>BJH-ads</sub> (nm) <sup>j</sup>                             | 4.14  | 4.14        | 4.14                      | 4.16         | 4.14                       |
| XRD                       | Relative crystallinity (%) <sup>k</sup>                            | 100   | 85          | 83                        | 85           | 84                         |
|                           | Average size of crystallites (nm) <sup>l</sup>                     | 13    | 11          | 10                        | 11           | 11                         |

<sup>a</sup>BET surface area; <sup>b</sup>t-plot micropore area; <sup>c</sup>External surface area; <sup>d</sup>Total pore volume; <sup>e</sup>Mesoporous volume; <sup>f</sup>Microporous volume; <sup>g</sup>Ratio of micropore and total volumes; <sup>h</sup>Ratio of mesopore and BET surface area; <sup>i</sup>Ratio of mesopore and micropore volumes; <sup>j</sup>BJH pore diameter; <sup>k</sup>Relative crystallinity (%) determined by ASTM D 5758; <sup>l</sup>Average size of crystallites determined by Scherrer equation.

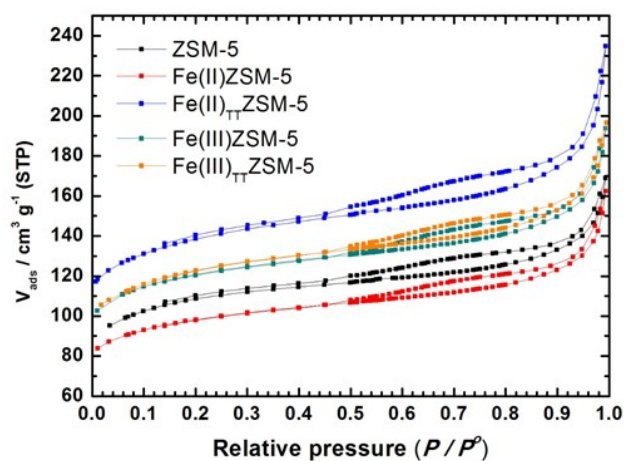

Figure S1- Nitrogen physisorption isotherms of (■) ZSM-5, (■) Fe(II)ZSM-5, (■) Fe(II)<sub>TT</sub>ZSM-5, (■) Fe(III)ZSM-5 and (■) Fe(III)<sub>TT</sub>ZSM-5.

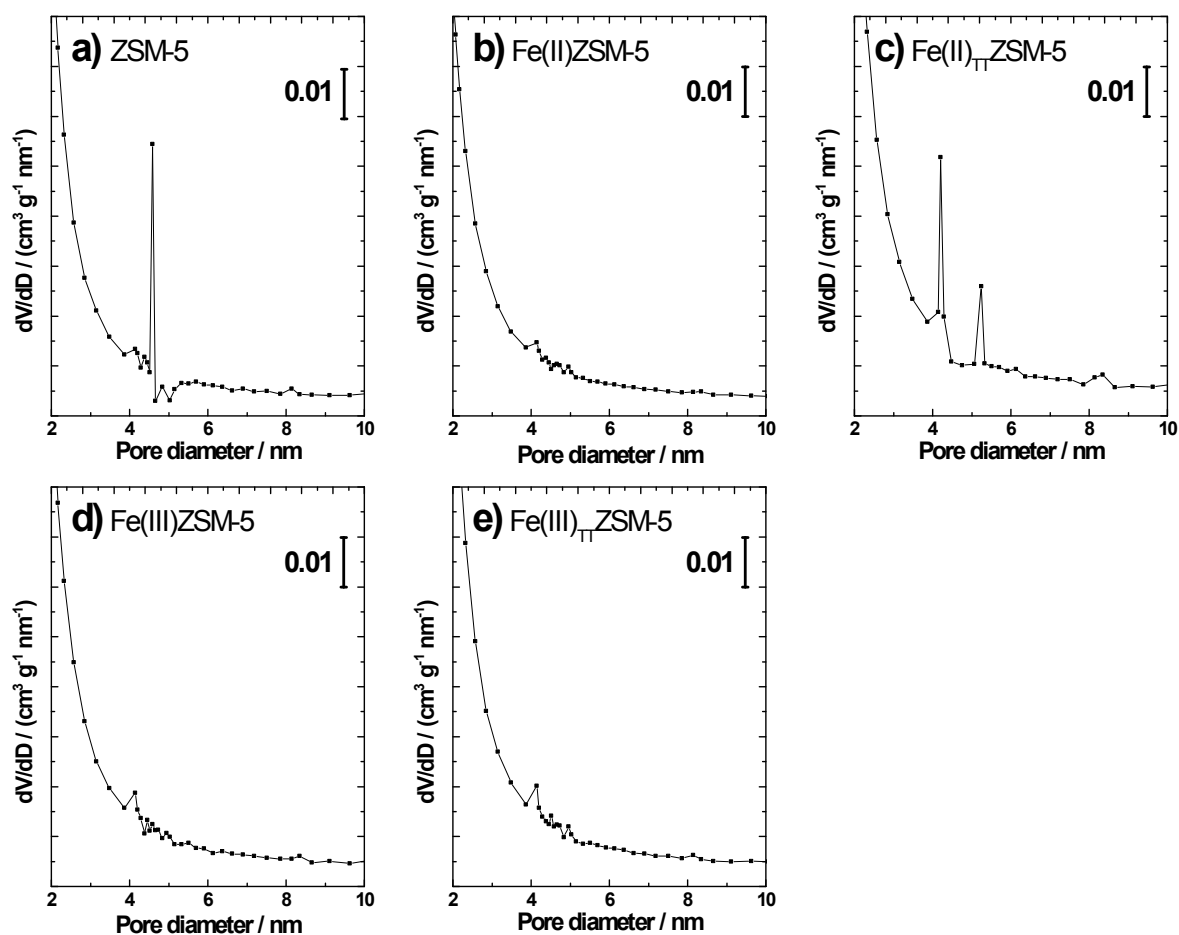

Figure S2. BJH pore size distributions of: a) ZSM-5, b) Fe(II)ZSM-5, c) Fe(II)<sub>TT</sub>ZSM-5, d) Fe(III)ZSM-5 and e) Fe(III)<sub>TT</sub>ZSM-5.

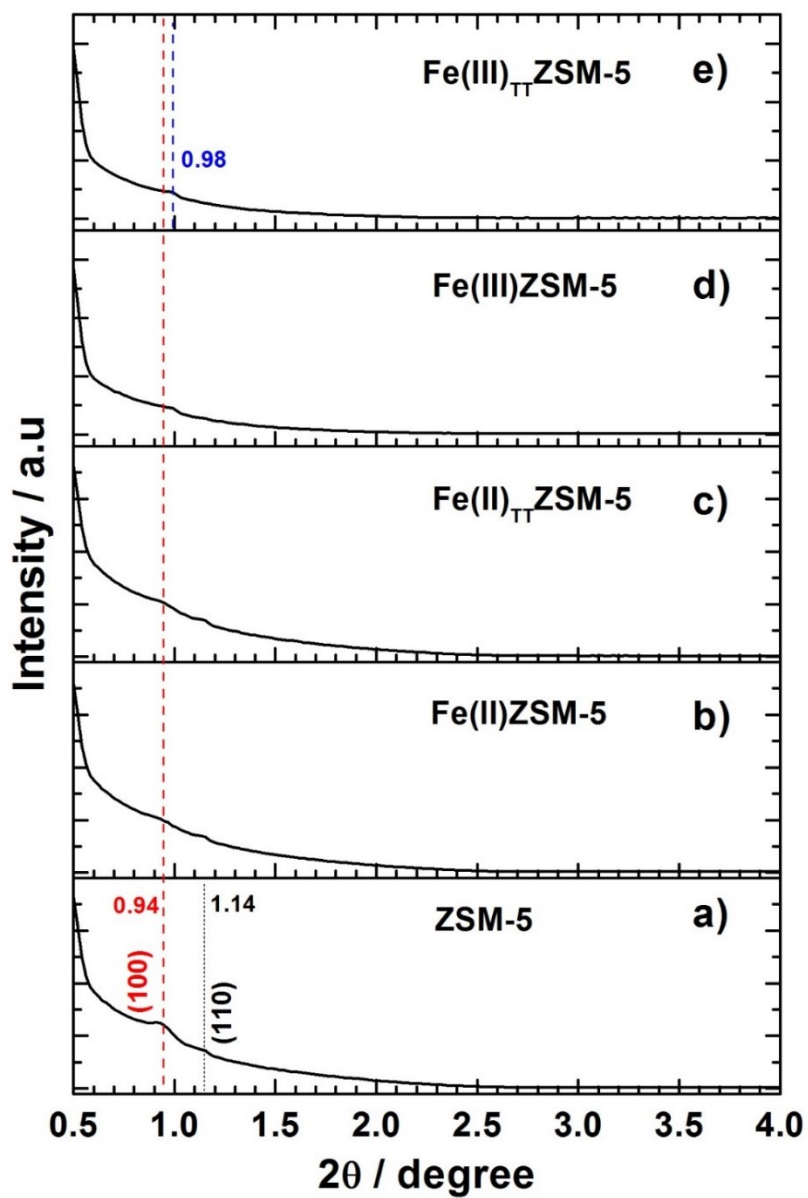

**Figure S3.** Low-angle XRD patterns of the a) ZSM-5, b) Fe(II)ZSM-5, c) Fe(II)<sub>T</sub>ZSM-5, d) Fe(III)ZSM-5 and e) Fe(III)<sub>T</sub>ZSM-5.

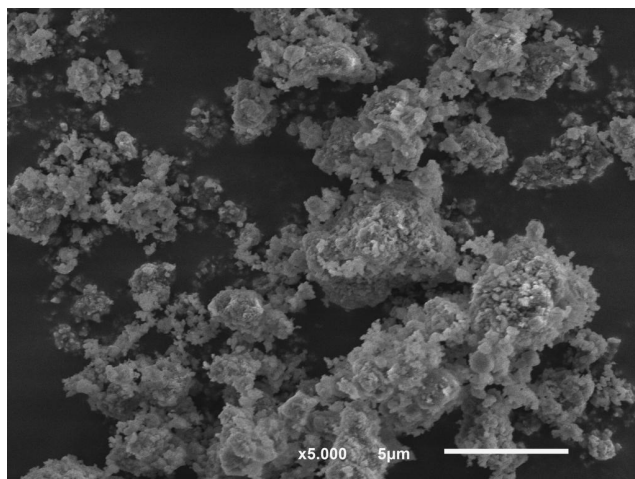

**Figure S4.** Representative SEM image of Fe(III)ZSM-5 with a scale bar of 5  $\mu\text{m}$ .

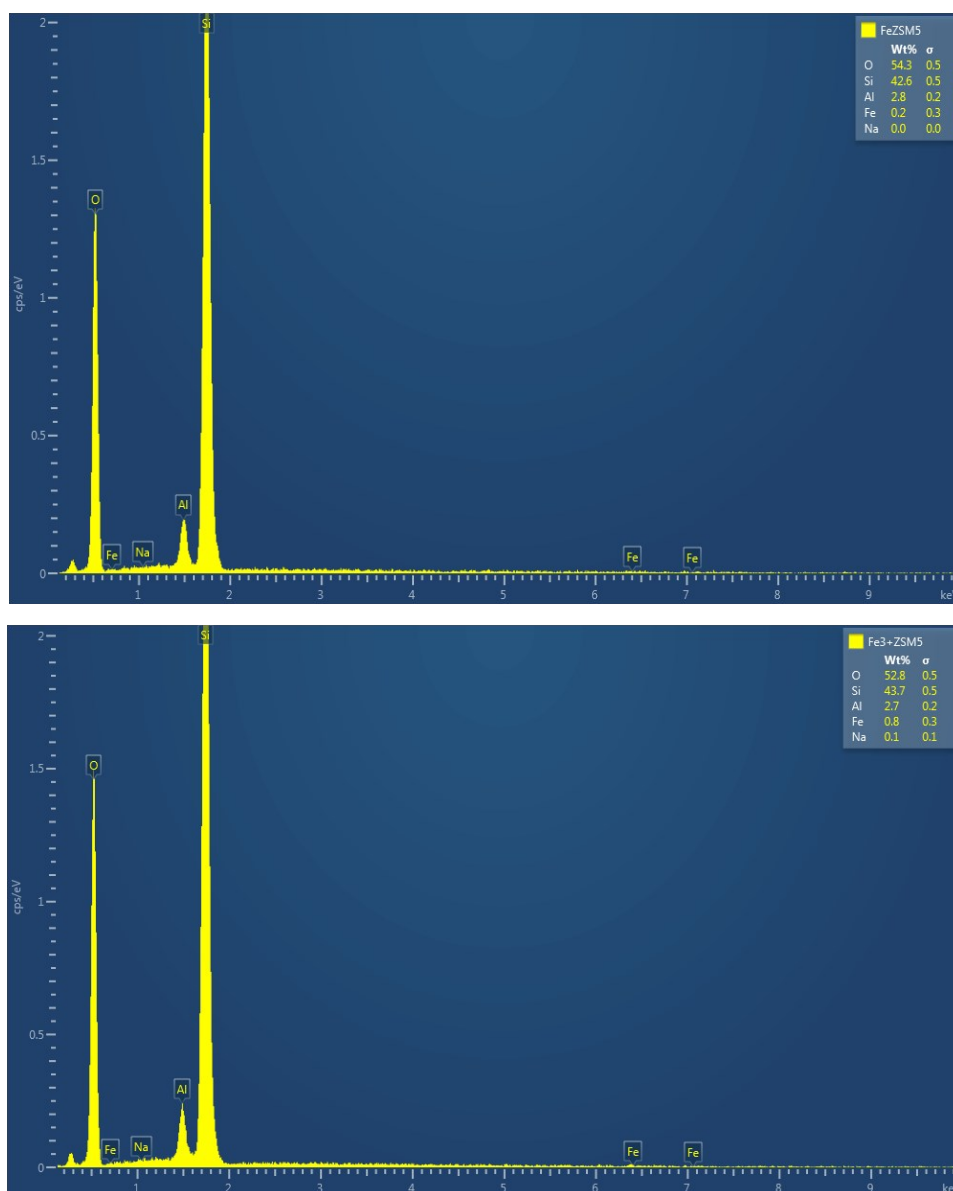

**Figure S5.** EDX spectra of Fe(II)<sub>TT</sub>ZSM-5 and Fe(III)<sub>TT</sub>ZSM-5.

**Table S2.** Elemental analysis from EDX measurements of the Fe-zeolite samples.

| Element (wt%) | Fe(II) <sub>TT</sub> ZSM-5 | Fe(III) <sub>TT</sub> ZSM-5 |
|---------------|----------------------------|-----------------------------|
| O             | 54.3                       | 52.8                        |
| Al            | 2.8                        | 2.7                         |
| Si            | 42.6                       | 43.7                        |
| Na            | 0                          | 0.1                         |
| Fe            | 0.2                        | 0.8                         |

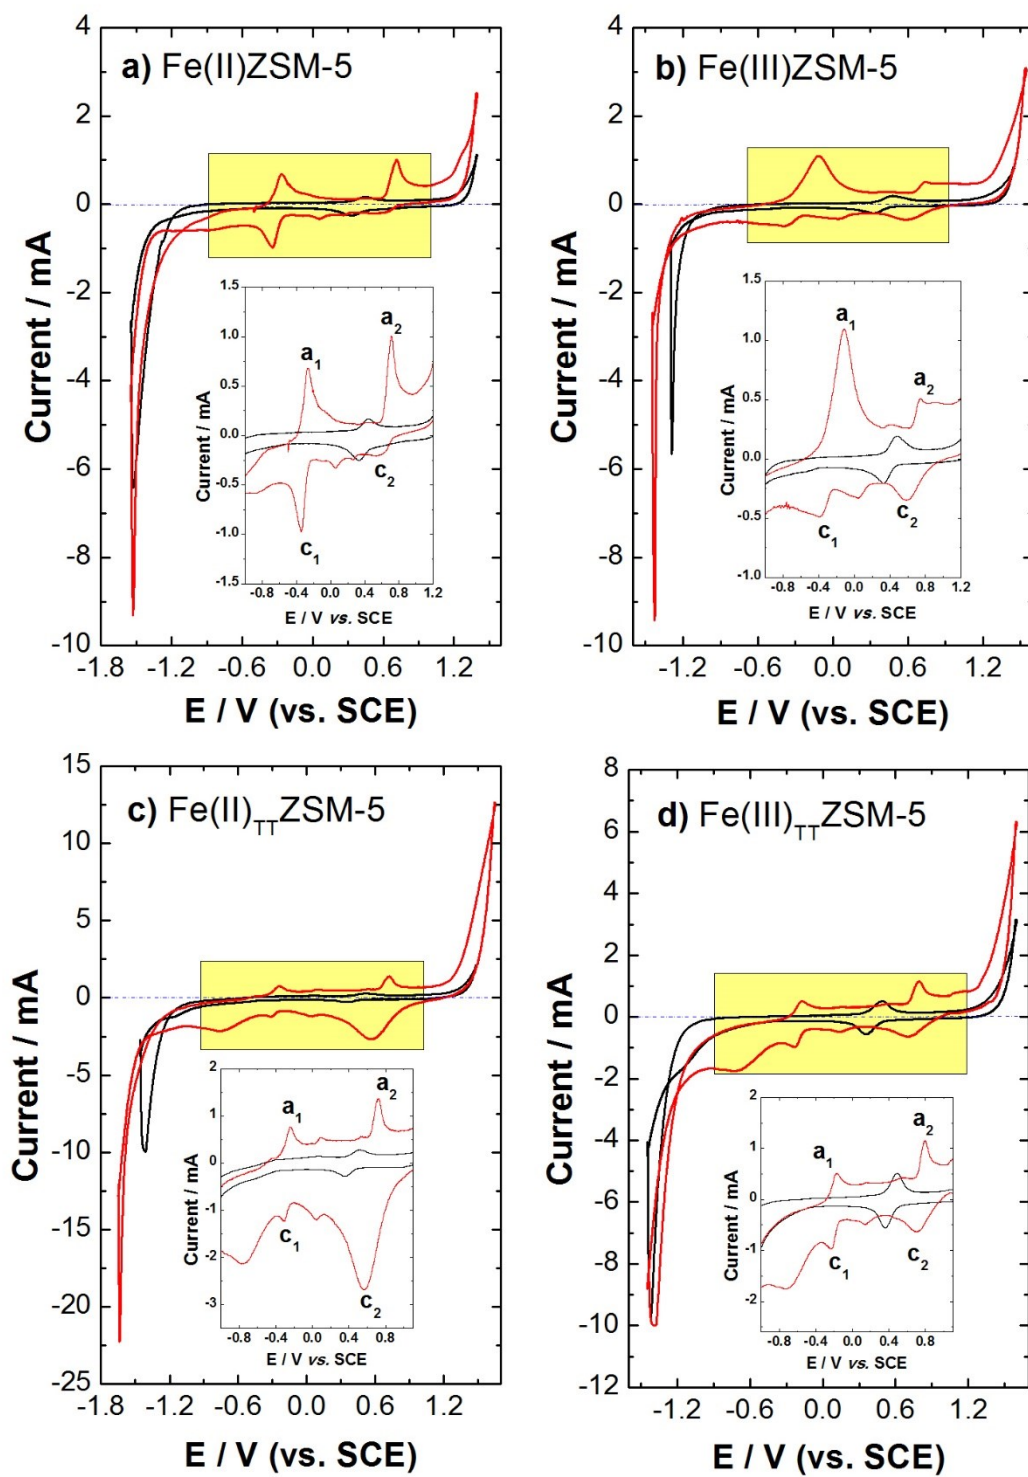

**Figure S6.** Cyclic voltammograms of a) Fe(II)ZSM-5, b) Fe(III)ZSM5, c) Fe(II)<sub>TT</sub>ZSM5 and d) Fe(III)<sub>TT</sub>ZSM5 modified electrodes recorded at 50 mV s<sup>-1</sup> in the absence of dye (black curve) and in the presence of 0.274 mmol L<sup>-1</sup> of ARS (red curve) in NaCl (0.10 mol L<sup>-1</sup>) / H<sub>2</sub>SO<sub>4</sub> (1.0 mmol L<sup>-1</sup>).

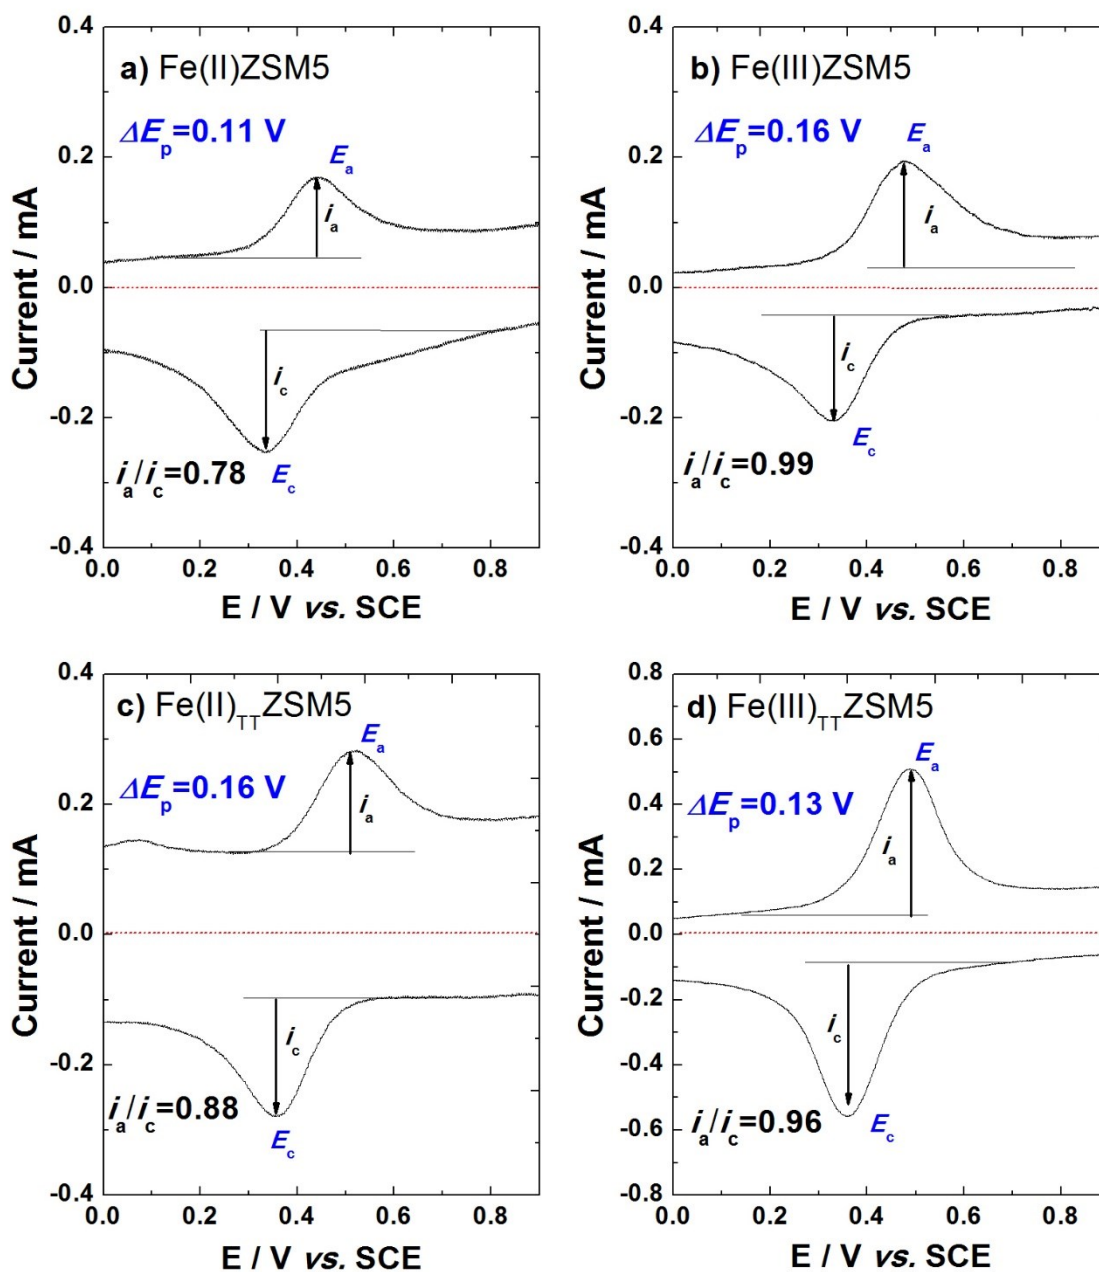

**Figure S7.** Cyclic voltammetry characterization of a) Fe(II)ZSM-5, b) Fe(III)ZSM5, c) Fe(II)<sub>TT</sub>ZSM5 and d) Fe(III)<sub>TT</sub>ZSM5 modified electrodes recorded at 50 mV s<sup>-1</sup> in N<sub>2</sub> de-aerated 0.1 mol L<sup>-1</sup> NaCl containing 1.0 mmol L<sup>-1</sup> H<sub>2</sub>SO<sub>4</sub> in the absence of dye.

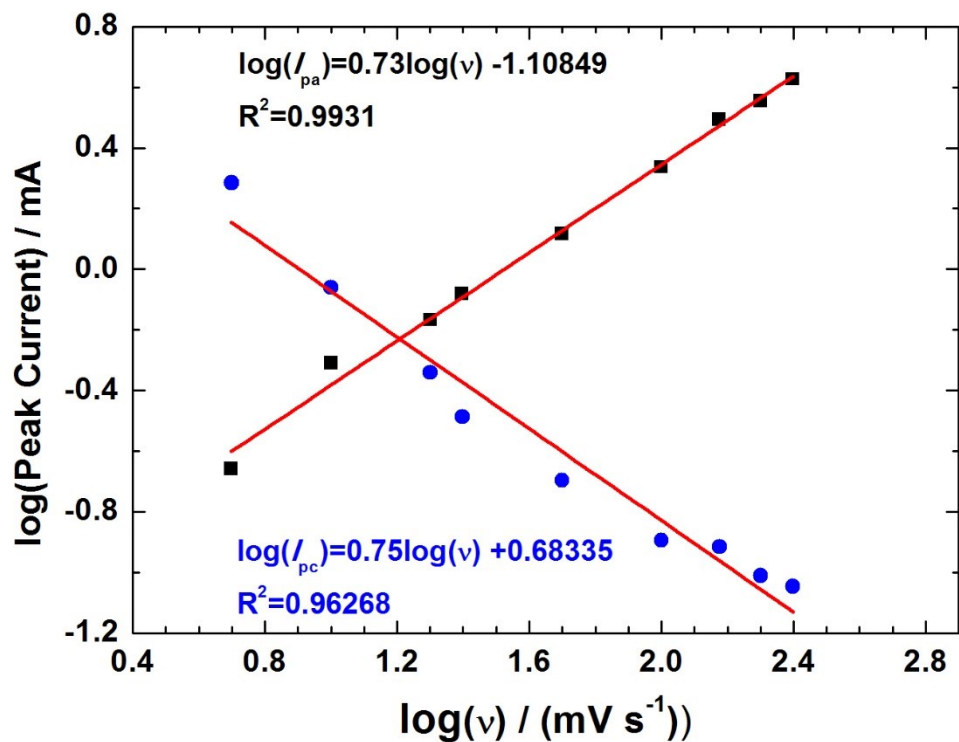

**Figure S8.** The dependences of logarithm of peak currents on logarithm scan rate.

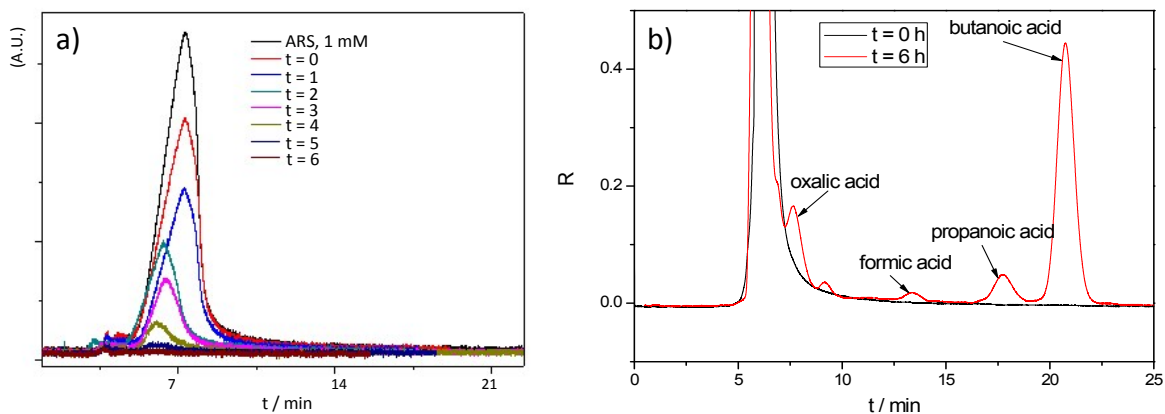

**Figure S9.** a) HPLC chromatograms of ARS (1 mM) and at different reaction times for the dye oxidation ( $\lambda = 550 \text{ nm}$ , RP18) and b) HPLC-UV chromatograms corresponding to the beginning (—) and to the end of the electrolysis (—).
